# Supplementary material for: Diffusible signal factor primes plant immunity against Xanthomonas campestris pv. campestris (Xcc) via JA signaling in Arabidopsis and Brassica oleracea
Source: Front Cell Infect Microbiol. 2023 Jun 19;13:1203582. doi: 10.3389/fcimb.2023.1203582 (PMC10315614; doi:10.3389/fcimb.2023.1203582)
Supplement: Supplementary Table 4 — DSF-Xcc_vs_CK-Xcc.DEG_GO_enriched_result (padjust 0.05). [file Table_4.xlsx]

## Sheet: Sheet1
Supplementary table 4. DSF-Xcc_vs_CK-Xcc.DEG_GO_enriched_result (padjust 0.05)
GO_ID	Term	Category	Test	Ref	TestAll	RefAll	geneID	Pvalue	FDR	richFactor
GO:0050896	response to stimulus	BP	118	6880	215	26322	AT1G01560,AT5G59720,AT4G10250,AT3G48520,AT1G02660,AT1G74930,AT5G24770,AT1G70130,AT1G56510,AT1G73805,AT2G34930,AT2G17660,AT5G45110,AT5G50260,AT1G32960,AT3G25250,AT5G64810,AT5G63770,AT2G34600,AT1G17380,AT1G30135,AT2G46400,AT1G19180,AT1G73080,AT3G06490,AT5G47910,AT5G13220,AT1G17750,AT2G44840,AT4G34390,AT1G52040,AT4G19230,AT4G34410,AT1G51090,AT5G64750,AT2G33380,AT4G14368,AT5G58120,AT5G45820,AT1G57850…	2.95073e-19	4.51756e-16	0.0171512
GO:0009611	response to wounding	BP	22	205	215	26322	AT3G48520,AT3G25250,AT5G63770,AT2G34600,AT2G02990,AT1G17380,AT1G30135,AT2G27690,AT1G66760,AT3G53600,AT1G19180,AT1G73080,AT1G74930,AT3G45140,AT3G17800,AT1G72520,AT1G20510,AT5G47910,AT1G17420,AT5G13220,AT1G17750,AT5G24770	2.12244e-18	1.62473e-15	0.107317
GO:0042221	response to chemical	BP	74	3461	215	26322	AT5G59720,AT4G10250,AT1G66760,AT5G52050,AT1G61890,AT2G33380,AT1G69920,AT4G02280,AT3G14440,AT1G12610,AT3G53600,AT2G17840,AT1G56600,AT2G39800,AT4G17615,AT3G06490,AT1G47510,AT5G18010,AT5G18050,AT5G18060,AT3G03660,AT5G45820,AT1G01560,AT5G64750,AT1G09950,AT1G69260,AT5G51990,AT4G21940,AT2G40330,AT5G19360,AT2G46400,AT1G28480,AT2G34600,AT1G17380,AT1G19180,AT1G73080,AT3G45140,AT1G20510,AT1G17420,AT5G13220…	1.06221e-15	5.42082e-13	0.0213811
GO:0006950	response to stress	BP	79	3973	215	26322	AT5G59720,AT4G10250,AT3G48520,AT1G02660,AT1G74930,AT5G24770,AT1G70130,AT1G56510,AT1G73805,AT2G17660,AT5G45110,AT5G50260,AT1G32960,AT3G25250,AT5G64810,AT5G63770,AT2G34600,AT1G17380,AT1G30135,AT2G46400,AT1G19180,AT1G73080,AT3G06490,AT5G47910,AT5G13220,AT1G17750,AT2G44840,AT4G34390,AT1G52040,AT4G19230,AT4G34410,AT1G51090,AT2G34930,AT5G64750,AT2G33380,AT3G14440,AT3G53600,AT1G35910,AT4G17615,AT5G05340…	4.23951e-15	1.62267e-12	0.0198842
GO:0051716	cellular response to stimulus	BP	73	3514	215	26322	AT1G01560,AT2G17660,AT4G14368,AT5G58120,AT5G45820,AT5G63770,AT1G57850,AT1G56510,AT1G63860,AT5G41740,AT5G38344,AT3G25510,AT2G32140,AT5G41550,AT5G41750,AT1G69260,AT4G34390,AT3G43890,AT1G76040,AT4G21940,AT5G19360,AT3G08720,AT1G70130,AT3G17690,AT5G42380,AT4G17615,AT5G47910,AT5G50260,AT1G73805,AT5G18010,AT3G03660,AT5G18050,AT5G18060,AT5G51990,AT2G40330,AT5G64750,AT1G09950,AT2G46400,AT1G28480,AT5G64810…	8.3073e-15	2.54369e-12	0.020774
GO:0001101	response to acid chemical	BP	43	1358	215	26322	AT2G33380,AT4G02280,AT3G14440,AT1G12610,AT3G53600,AT2G17840,AT1G56600,AT2G39800,AT4G17615,AT5G45820,AT1G01560,AT1G47510,AT5G52050,AT3G06490,AT5G64750,AT1G09950,AT1G69260,AT5G51990,AT4G21940,AT2G40330,AT5G19360,AT1G28480,AT2G46400,AT2G34600,AT1G17380,AT1G19180,AT1G73080,AT3G45140,AT1G20510,AT1G17420,AT5G13220,AT1G17750,AT5G24770,AT5G64810,AT5G42380,AT3G17800,AT1G72520,AT4G36830,AT5G13200,AT2G47780…	1.48786e-14	3.25416e-12	0.0316642
GO:1901700	response to oxygen-containing compound	BP	50	1810	215	26322	AT5G59720,AT4G10250,AT2G33380,AT4G02280,AT3G14440,AT1G12610,AT3G53600,AT2G17840,AT1G56600,AT2G39800,AT4G17615,AT5G45820,AT1G01560,AT1G47510,AT5G52050,AT3G06490,AT5G64750,AT1G09950,AT1G69260,AT5G51990,AT4G21940,AT2G40330,AT5G19360,AT2G46400,AT1G28480,AT2G34600,AT1G17380,AT1G19180,AT1G73080,AT3G45140,AT1G20510,AT1G17420,AT5G13220,AT1G17750,AT5G24770,AT5G64810,AT2G28210,AT5G42380,AT3G17800,AT1G72520…	1.4801e-14	3.25416e-12	0.0276243
GO:0007154	cell communication	BP	58	2503	215	26322	AT1G01560,AT2G17660,AT4G14368,AT5G58120,AT5G45820,AT5G63770,AT1G57850,AT1G56510,AT1G63860,AT5G41740,AT5G38344,AT3G25510,AT2G32140,AT5G41550,AT5G41750,AT1G69260,AT4G34390,AT3G43890,AT1G76040,AT4G21940,AT5G19360,AT3G08720,AT1G70130,AT3G17690,AT5G42380,AT4G17615,AT5G47910,AT5G18010,AT3G03660,AT5G18050,AT5G18060,AT5G51990,AT2G40330,AT5G64750,AT1G09950,AT2G46400,AT1G28480,AT5G64810,AT1G19180,AT2G20880…	1.41632e-13	2.71049e-11	0.0231722
GO:0009753	response to jasmonic acid	BP	19	247	215	26322	AT5G64810,AT1G28480,AT1G19180,AT2G40330,AT5G45110,AT2G34600,AT1G17380,AT1G30135,AT2G46400,AT3G53600,AT5G13220,AT1G47510,AT1G73080,AT3G45140,AT3G06490,AT1G20510,AT1G17420,AT1G17750,AT5G24770	2.18856e-13	3.72299e-11	0.0769231
GO:0007165	signal transduction	BP	53	2171	215	26322	AT1G01560,AT2G17660,AT3G43890,AT1G76040,AT5G63770,AT4G21940,AT5G19360,AT3G08720,AT1G70130,AT4G34390,AT3G17690,AT5G42380,AT4G17615,AT5G47910,AT5G18010,AT3G03660,AT5G18050,AT5G18060,AT5G51990,AT2G40330,AT5G64750,AT1G09950,AT1G69260,AT2G46400,AT1G28480,AT5G64810,AT1G19180,AT2G20880,AT1G33760,AT4G34410,AT1G74930,AT1G19210,AT5G21960,AT2G44840,AT4G36950,AT5G45110,AT2G34600,AT1G17380,AT1G30135,AT3G53600…	2.85466e-13	4.37049e-11	0.0244127
GO:0023052	signaling	BP	53	2213	215	26322	AT1G01560,AT2G17660,AT4G14368,AT5G58120,AT5G45820,AT5G63770,AT1G57850,AT1G56510,AT1G63860,AT5G41740,AT5G38344,AT3G25510,AT2G32140,AT5G41550,AT5G41750,AT1G69260,AT4G34390,AT3G43890,AT1G76040,AT4G21940,AT5G19360,AT3G08720,AT1G70130,AT3G17690,AT5G42380,AT4G17615,AT5G47910,AT5G18010,AT3G03660,AT5G18050,AT5G18060,AT5G51990,AT2G40330,AT5G64750,AT1G09950,AT2G46400,AT1G28480,AT5G64810,AT1G19180,AT2G20880…	6.05848e-13	8.4323e-11	0.0239494
GO:0070887	cellular response to chemical stimulus	BP	46	1764	215	26322	AT5G18010,AT3G03660,AT5G18050,AT5G18060,AT5G51990,AT4G21940,AT2G40330,AT5G19360,AT5G64750,AT1G09950,AT1G69260,AT4G17615,AT2G46400,AT1G28480,AT5G64810,AT1G19180,AT2G20880,AT1G33760,AT4G34410,AT1G74930,AT1G19210,AT5G21960,AT2G44840,AT3G53600,AT4G36830,AT2G33580,AT4G30280,AT5G58120,AT5G45630,AT3G25250,AT5G66985,AT5G42380,AT4G01360,AT3G46080,AT5G62520,AT3G08720,AT5G47910,AT1G78070,AT4G10250,AT5G05340…	1.60692e-12	2.05016e-10	0.0260771
GO:0009719	response to endogenous stimulus	BP	46	1972	215	26322	AT3G06490,AT1G47510,AT5G18010,AT5G18050,AT5G18060,AT3G03660,AT5G45820,AT1G01560,AT5G52050,AT2G17840,AT1G56600,AT5G64750,AT1G09950,AT2G33380,AT1G69260,AT5G51990,AT4G21940,AT2G40330,AT5G19360,AT4G17615,AT2G46400,AT1G28480,AT2G34600,AT1G17380,AT3G53600,AT1G19180,AT1G73080,AT3G45140,AT1G20510,AT1G17420,AT5G13220,AT1G17750,AT5G24770,AT5G64810,AT2G20880,AT1G33760,AT4G34410,AT1G74930,AT1G19210,AT5G21960…	7.12599e-11	8.39222e-09	0.0233266
GO:0010033	response to organic substance	BP	50	2311	215	26322	AT3G06490,AT1G47510,AT5G18010,AT5G18050,AT5G18060,AT3G03660,AT5G45820,AT1G01560,AT5G52050,AT2G17840,AT1G56600,AT5G64750,AT1G09950,AT2G33380,AT1G69260,AT5G51990,AT4G21940,AT2G40330,AT5G19360,AT4G17615,AT2G46400,AT1G28480,AT2G34600,AT1G17380,AT3G53600,AT1G19180,AT1G73080,AT3G45140,AT1G20510,AT1G17420,AT5G13220,AT1G17750,AT5G24770,AT5G64810,AT2G20880,AT1G33760,AT4G34410,AT1G74930,AT1G19210,AT5G21960…	1.25503e-10	1.37246e-08	0.0216357
GO:0009725	response to hormone	BP	45	1937	215	26322	AT3G06490,AT1G47510,AT5G18010,AT5G18050,AT5G18060,AT3G03660,AT5G45820,AT1G01560,AT5G52050,AT2G17840,AT1G56600,AT5G64750,AT1G09950,AT2G33380,AT1G69260,AT5G51990,AT4G21940,AT2G40330,AT5G19360,AT4G17615,AT2G46400,AT1G28480,AT2G34600,AT1G17380,AT3G53600,AT1G19180,AT1G73080,AT3G45140,AT1G20510,AT1G17420,AT5G13220,AT1G17750,AT5G24770,AT5G64810,AT2G20880,AT1G33760,AT4G34410,AT1G74930,AT1G19210,AT5G21960…	1.37262e-10	1.40099e-08	0.0232318
GO:0009867	jasmonic acid mediated signaling pathway	BP	11	97	215	26322	AT5G45110,AT2G34600,AT1G17380,AT1G30135,AT2G46400,AT3G53600,AT1G19180,AT5G13220,AT5G64810,AT1G28480,AT2G40330	4.49514e-10	4.30129e-08	0.113402
GO:0071395	cellular response to jasmonic acid stimulus	BP	11	101	215	26322	AT5G64810,AT1G28480,AT1G19180,AT2G40330,AT5G45110,AT2G34600,AT1G17380,AT1G30135,AT2G46400,AT3G53600,AT5G13220	6.98103e-10	6.28704e-08	0.108911
GO:2000022	regulation of jasmonic acid mediated signaling pathway	BP	8	41	215	26322	AT5G45110,AT2G34600,AT1G17380,AT1G30135,AT2G46400,AT3G53600,AT1G19180,AT5G13220	1.31806e-09	1.12108e-07	0.195122
GO:0009755	hormone-mediated signaling pathway	BP	29	981	215	26322	AT5G18010,AT3G03660,AT5G18050,AT5G18060,AT5G51990,AT4G21940,AT2G40330,AT5G19360,AT5G64750,AT1G09950,AT1G69260,AT4G17615,AT2G46400,AT5G64810,AT1G28480,AT1G19180,AT2G20880,AT1G33760,AT4G34410,AT1G74930,AT1G19210,AT5G21960,AT2G44840,AT5G45110,AT2G34600,AT1G17380,AT1G30135,AT3G53600,AT5G13220	2.26164e-09	1.82241e-07	0.0295617
GO:0071495	cellular response to endogenous stimulus	BP	31	1141	215	26322	AT5G18010,AT3G03660,AT5G18050,AT5G18060,AT5G51990,AT4G21940,AT2G40330,AT5G19360,AT5G64750,AT1G09950,AT1G69260,AT4G17615,AT2G46400,AT1G28480,AT5G64810,AT1G19180,AT2G20880,AT1G33760,AT4G34410,AT1G74930,AT1G19210,AT5G21960,AT2G44840,AT4G36830,AT2G33580,AT5G45110,AT2G34600,AT1G17380,AT1G30135,AT3G53600,AT5G13220	4.41916e-09	3.38286e-07	0.0271691
GO:0032870	cellular response to hormone stimulus	BP	30	1105	215	26322	AT5G18010,AT3G03660,AT5G18050,AT5G18060,AT5G51990,AT4G21940,AT2G40330,AT5G19360,AT5G64750,AT1G09950,AT1G69260,AT4G17615,AT2G46400,AT1G28480,AT5G64810,AT1G19180,AT2G20880,AT1G33760,AT4G34410,AT1G74930,AT1G19210,AT5G21960,AT2G44840,AT4G36830,AT5G45110,AT2G34600,AT1G17380,AT1G30135,AT3G53600,AT5G13220	8.2075e-09	5.98366e-07	0.0271493
GO:0071456	cellular response to hypoxia	BP	14	239	215	26322	AT4G30280,AT5G58120,AT5G45630,AT3G25250,AT2G46400,AT5G66985,AT5G42380,AT4G01360,AT3G46080,AT5G62520,AT3G08720,AT5G47910,AT1G78070,AT4G10250	1.18191e-08	8.22503e-07	0.0585774
GO:0036294	cellular response to decreased oxygen levels	BP	14	241	215	26322	AT4G30280,AT5G58120,AT5G45630,AT3G25250,AT2G46400,AT5G66985,AT5G42380,AT4G01360,AT3G46080,AT5G62520,AT3G08720,AT5G47910,AT1G78070,AT4G10250	1.3136e-08	8.37967e-07	0.0580913
GO:0071453	cellular response to oxygen levels	BP	14	241	215	26322	AT4G30280,AT5G58120,AT5G45630,AT3G25250,AT2G46400,AT5G66985,AT5G42380,AT4G01360,AT3G46080,AT5G62520,AT3G08720,AT5G47910,AT1G78070,AT4G10250	1.3136e-08	8.37967e-07	0.0580913
GO:0009605	response to external stimulus	BP	39	1793	215	26322	AT3G48520,AT1G02660,AT1G74930,AT5G24770,AT1G70130,AT1G56510,AT1G73805,AT2G34930,AT5G45110,AT5G64810,AT2G46400,AT1G19180,AT1G17750,AT4G34390,AT5G50260,AT4G19230,AT4G34410,AT1G51090,AT5G64750,AT5G47910,AT2G33380,AT3G13100,AT3G45140,AT1G72520,AT1G20510,AT3G06490,AT1G17420,AT1G59740,AT1G32960,AT2G32130,AT5G13220,AT2G03240,AT2G02990,AT1G26730,AT5G13080,AT3G53600,AT3G08860,AT3G17690,AT2G25160	1.7966e-08	1.10024e-06	0.0217513
GO:0001666	response to hypoxia	BP	14	264	215	26322	AT4G30280,AT5G58120,AT5G45630,AT3G25250,AT2G46400,AT5G66985,AT5G42380,AT4G01360,AT3G46080,AT5G62520,AT3G08720,AT5G47910,AT1G78070,AT4G10250	4.13064e-08	2.43231e-06	0.0530303
GO:0043207	response to external biotic stimulus	BP	32	1334	215	26322	AT3G48520,AT1G02660,AT1G74930,AT5G24770,AT1G70130,AT1G56510,AT1G73805,AT2G34930,AT5G45110,AT5G64810,AT2G46400,AT1G19180,AT1G17750,AT4G34390,AT5G50260,AT4G19230,AT4G34410,AT1G51090,AT5G64750,AT5G47910,AT2G33380,AT3G13100,AT3G45140,AT1G72520,AT1G20510,AT3G06490,AT1G17420,AT1G59740,AT1G32960,AT5G13220,AT3G17690,AT2G25160	4.56069e-08	2.49372e-06	0.023988
GO:0051707	response to other organism	BP	32	1334	215	26322	AT3G48520,AT1G02660,AT1G74930,AT5G24770,AT1G70130,AT1G56510,AT1G73805,AT2G34930,AT5G45110,AT5G64810,AT2G46400,AT1G19180,AT1G17750,AT4G34390,AT5G50260,AT4G19230,AT4G34410,AT1G51090,AT5G64750,AT5G47910,AT2G33380,AT3G45140,AT1G72520,AT1G20510,AT3G06490,AT1G17420,AT1G59740,AT1G32960,AT5G13220,AT3G17690,AT2G25160,AT3G13100	4.56069e-08	2.49372e-06	0.023988
GO:0036293	response to decreased oxygen levels	BP	14	268	215	26322	AT4G30280,AT5G58120,AT5G45630,AT3G25250,AT2G46400,AT5G66985,AT5G42380,AT4G01360,AT3G46080,AT5G62520,AT3G08720,AT5G47910,AT1G78070,AT4G10250	4.98118e-08	2.54206e-06	0.0522388
GO:0071310	cellular response to organic substance	BP	31	1267	215	26322	AT5G18010,AT3G03660,AT5G18050,AT5G18060,AT5G51990,AT4G21940,AT2G40330,AT5G19360,AT5G64750,AT1G09950,AT1G69260,AT4G17615,AT2G46400,AT1G28480,AT5G64810,AT1G19180,AT2G20880,AT1G33760,AT4G34410,AT1G74930,AT1G19210,AT5G21960,AT2G44840,AT4G36830,AT2G33580,AT5G45110,AT2G34600,AT1G17380,AT1G30135,AT3G53600,AT5G13220	4.88254e-08	2.54206e-06	0.0244672
GO:0070482	response to oxygen levels	BP	14	269	215	26322	AT4G30280,AT5G58120,AT5G45630,AT3G25250,AT2G46400,AT5G66985,AT5G42380,AT4G01360,AT3G46080,AT5G62520,AT3G08720,AT5G47910,AT1G78070,AT4G10250	5.21719e-08	2.57662e-06	0.0520446
GO:0009607	response to biotic stimulus	BP	32	1347	215	26322	AT3G48520,AT1G02660,AT1G74930,AT5G24770,AT1G70130,AT1G56510,AT1G73805,AT2G34930,AT5G45110,AT5G64810,AT2G46400,AT1G19180,AT1G17750,AT4G34390,AT5G50260,AT4G19230,AT4G34410,AT1G51090,AT5G64750,AT5G47910,AT2G33380,AT3G13100,AT3G45140,AT1G72520,AT1G20510,AT3G06490,AT1G17420,AT1G59740,AT1G32960,AT5G13220,AT3G17690,AT2G25160	5.69756e-08	2.72593e-06	0.0237565
GO:0009628	response to abiotic stimulus	BP	45	2372	215	26322	AT3G14440,AT3G53600,AT1G35910,AT5G64750,AT4G17615,AT5G47910,AT2G33380,AT5G59720,AT1G12610,AT3G08720,AT4G10250,AT5G63770,AT2G17840,AT1G56600,AT4G02280,AT2G39800,AT1G02400,AT4G19230,AT2G32130,AT1G17420,AT2G20880,AT3G28600,AT1G47510,AT3G06490,AT5G62520,AT1G09950,AT3G17800,AT1G73805,AT3G45650,AT1G56510,AT4G30280,AT5G58120,AT5G45630,AT3G25250,AT2G46400,AT5G66985,AT5G42380,AT4G01360,AT3G46080,AT1G78070…	7.07654e-08	3.28309e-06	0.0189713
GO:0006952	defense response	BP	35	1606	215	26322	AT3G48520,AT1G02660,AT1G74930,AT5G24770,AT1G70130,AT1G56510,AT1G73805,AT2G17660,AT5G45110,AT5G64810,AT2G46400,AT1G19180,AT1G17750,AT4G34390,AT5G50260,AT4G19230,AT4G34410,AT1G51090,AT2G34930,AT5G64750,AT5G47910,AT2G33380,AT1G32960,AT5G13220,AT2G34600,AT1G17380,AT1G30135,AT2G33580,AT1G73080,AT2G25160,AT3G25250,AT5G63770,AT3G06490,AT2G44840,AT1G52040	1.04041e-07	4.68491e-06	0.0217933
GO:0071229	cellular response to acid chemical	BP	19	594	215	26322	AT5G51990,AT4G21940,AT2G40330,AT5G19360,AT5G64750,AT1G09950,AT1G69260,AT4G17615,AT1G28480,AT5G64810,AT1G19180,AT3G53600,AT4G36830,AT5G45110,AT2G34600,AT1G17380,AT1G30135,AT2G46400,AT5G13220	4.85068e-07	2.12183e-05	0.0319865
GO:0016165	linoleate 13S-lipoxygenase activity	MF	3	4	215	26322	AT3G45140,AT1G72520,AT1G17420	2.13675e-06	9.08711e-05	0.75
GO:0080134	regulation of response to stress	BP	15	426	215	26322	AT2G17660,AT5G13220,AT1G73805,AT2G34600,AT1G17380,AT1G30135,AT1G19180,AT1G02660,AT2G20880,AT1G09950,AT1G51090,AT3G53600,AT2G47780,AT2G46400,AT5G52050	2.54147e-06	0.000105162	0.0352113
GO:0043531	ADP binding	MF	10	185	215	26322	AT4G14368,AT5G58120,AT5G38350,AT1G56510,AT1G63860,AT5G41740,AT5G38344,AT3G25510,AT5G41550,AT5G41750	3.12799e-06	0.000126025	0.0540541
GO:0006970	response to osmotic stress	BP	19	701	215	26322	AT5G47910,AT5G59720,AT2G20880,AT3G28600,AT1G47510,AT2G17840,AT1G35910,AT1G56600,AT3G06490,AT5G62520,AT2G39800,AT3G08720,AT1G09950,AT2G33380,AT4G17615,AT4G10250,AT3G14440,AT3G53600,AT5G64750	5.48325e-06	0.000215253	0.0271041
GO:0048583	regulation of response to stimulus	BP	20	786	215	26322	AT2G17660,AT5G64750,AT1G09950,AT5G13220,AT1G73805,AT4G34410,AT2G34600,AT1G17380,AT1G30135,AT1G19180,AT1G02660,AT5G13080,AT5G45110,AT2G20880,AT1G51090,AT2G46400,AT3G53600,AT2G47780,AT3G21320,AT5G52050	7.82625e-06	0.00029955	0.0254453
GO:0009737	response to abscisic acid	BP	18	658	215	26322	AT5G51990,AT4G21940,AT2G40330,AT5G19360,AT5G64750,AT1G09950,AT1G69260,AT4G17615,AT4G36830,AT5G13200,AT5G45820,AT1G01560,AT1G47510,AT5G52050,AT2G17840,AT1G56600,AT3G06490,AT2G33380	8.62214e-06	0.000314298	0.0273556
GO:0098542	defense response to other organism	BP	24	1075	215	26322	AT3G48520,AT1G02660,AT1G74930,AT5G24770,AT1G70130,AT1G56510,AT1G73805,AT5G45110,AT5G64810,AT2G46400,AT1G19180,AT1G17750,AT4G34390,AT5G50260,AT4G19230,AT4G34410,AT1G51090,AT2G34930,AT5G64750,AT5G47910,AT2G33380,AT1G32960,AT5G13220,AT2G25160	8.57696e-06	0.000314298	0.0223256
GO:0051704	multi-organism process	BP	35	1956	215	26322	AT3G48520,AT1G02660,AT1G74930,AT5G24770,AT1G70130,AT1G56510,AT1G73805,AT2G34930,AT5G45110,AT5G64810,AT2G46400,AT1G19180,AT1G17750,AT4G34390,AT5G50260,AT4G19230,AT4G34410,AT1G51090,AT5G64750,AT5G47910,AT2G33380,AT3G13100,AT3G45140,AT1G72520,AT1G20510,AT3G06490,AT1G17420,AT1G59740,AT1G32960,AT4G17615,AT5G13220,AT1G61610,AT3G17690,AT5G19360,AT2G25160	9.41327e-06	0.000327539	0.0178937
GO:0097305	response to alcohol	BP	18	662	215	26322	AT5G45820,AT1G01560,AT1G47510,AT5G52050,AT2G17840,AT1G56600,AT3G06490,AT5G64750,AT1G09950,AT2G33380,AT1G69260,AT5G51990,AT4G21940,AT2G40330,AT5G19360,AT4G17615,AT4G36830,AT5G13200	9.35756e-06	0.000327539	0.0271903
GO:1901701	cellular response to oxygen-containing compound	BP	20	800	215	26322	AT5G51990,AT4G21940,AT2G40330,AT5G19360,AT5G64750,AT1G09950,AT1G69260,AT4G17615,AT2G46400,AT1G28480,AT5G64810,AT1G19180,AT3G53600,AT4G36830,AT2G33580,AT5G45110,AT2G34600,AT1G17380,AT1G30135,AT5G13220	1.01204e-05	0.000344317	0.025
GO:0035556	intracellular signal transduction	BP	19	748	215	26322	AT1G01560,AT3G17690,AT5G42380,AT4G17615,AT2G20880,AT1G33760,AT4G34410,AT1G74930,AT5G64750,AT1G19210,AT5G21960,AT2G44840,AT4G36950,AT3G43890,AT1G76040,AT5G63770,AT4G21940,AT5G19360,AT3G08720	1.36455e-05	0.000445602	0.0254011
GO:0042493	response to drug	BP	18	681	215	26322	AT1G66760,AT5G52050,AT1G61890,AT1G28480,AT2G46400,AT2G33380,AT2G28210,AT5G42380,AT3G17800,AT1G72520,AT2G34600,AT4G34410,AT3G53600,AT3G46080,AT2G44840,AT5G59720,AT4G10250,AT2G33580	1.36795e-05	0.000445602	0.0264317
GO:2000070	regulation of response to water deprivation	BP	5	38	215	26322	AT3G53600,AT2G47780,AT2G20880,AT2G46400,AT5G52050	1.39863e-05	0.000446105	0.131579
GO:0006979	response to oxidative stress	BP	15	498	215	26322	AT5G59720,AT4G10250,AT5G42380,AT3G17800,AT1G72520,AT5G05340,AT4G12000,AT5G26030,AT3G25250,AT4G21840,AT1G35910,AT1G56600,AT5G64110,AT2G39800,AT5G24770	1.63838e-05	0.00051191	0.0301205
GO:0009414	response to water deprivation	BP	13	397	215	26322	AT2G33380,AT3G53600,AT2G47780,AT2G20880,AT2G46400,AT5G52050,AT4G02280,AT3G14440,AT1G12610,AT2G17840,AT1G56600,AT2G39800,AT4G17615	2.57119e-05	0.000787297	0.0327456
GO:0050789	regulation of biological process	BP	78	6284	215	26322	AT5G13080,AT1G28480,AT1G01560,AT2G17660,AT4G14368,AT5G58120,AT5G45820,AT5G63770,AT1G57850,AT1G56510,AT1G63860,AT5G41740,AT5G38344,AT3G25510,AT2G32140,AT5G41550,AT5G41750,AT1G69260,AT4G34390,AT3G43890,AT1G76040,AT4G21940,AT5G19360,AT3G08720,AT1G70130,AT2G22760,AT2G20880,AT1G68880,AT5G64810,AT5G51990,AT5G43650,AT1G33760,AT5G01380,AT4G34410,AT1G12610,AT2G46400,AT3G53600,AT1G74930,AT1G63030,AT3G46080…	2.86709e-05	0.000860688	0.0124125
GO:0009415	response to water	BP	13	406	215	26322	AT2G33380,AT4G02280,AT3G14440,AT1G12610,AT3G53600,AT2G17840,AT1G56600,AT2G39800,AT4G17615,AT2G47780,AT2G20880,AT2G46400,AT5G52050	3.24163e-05	0.000954411	0.0320197
GO:0031407	oxylipin metabolic process	BP	4	26	215	26322	AT3G45140,AT1G72520,AT1G17420,AT2G33380	5.61965e-05	0.00162334	0.153846
GO:0009651	response to salt stress	BP	16	625	215	26322	AT3G14440,AT2G39800,AT1G09950,AT5G59720,AT2G20880,AT3G28600,AT1G47510,AT2G17840,AT1G35910,AT1G56600,AT3G06490,AT5G62520,AT3G08720,AT2G33380,AT4G17615,AT4G10250	6.07457e-05	0.00172225	0.0256
GO:0050794	regulation of cellular process	BP	70	5575	215	26322	AT5G13080,AT1G28480,AT1G01560,AT2G17660,AT4G14368,AT5G58120,AT5G45820,AT5G63770,AT1G57850,AT1G56510,AT1G63860,AT5G41740,AT5G38344,AT3G25510,AT2G32140,AT5G41550,AT5G41750,AT1G69260,AT4G34390,AT3G43890,AT1G76040,AT4G21940,AT5G19360,AT3G08720,AT1G70130,AT2G22760,AT2G20880,AT1G68880,AT5G64810,AT5G51990,AT5G43650,AT1G33760,AT5G01380,AT4G34410,AT1G12610,AT2G46400,AT3G53600,AT1G74930,AT1G63030,AT3G46080…	6.50502e-05	0.00181076	0.0125561
GO:0047782	coniferin beta-glucosidase activity	MF	2	2	215	26322	AT1G61810,AT1G61820	6.64096e-05	0.00181559	1
GO:0035673	oligopeptide transmembrane transporter activity	MF	5	54	215	26322	AT1G59740,AT5G11570,AT1G09930,AT3G45650,AT3G45660	7.92556e-05	0.00212878	0.0925926
GO:0002213	defense response to insect	BP	4	29	215	26322	AT3G48520,AT1G02660,AT1G74930,AT5G24770	8.75817e-05	0.00231186	0.137931
GO:0044281	small molecule metabolic process	BP	33	2015	215	26322	AT5G01100,AT1G56600,AT3G20520,AT5G65690,AT1G73080,AT4G23590,AT4G31730,AT1G15040,AT2G39800,AT4G36830,AT3G45140,AT1G72520,AT1G65890,AT1G17420,AT2G28210,AT1G02400,AT4G19230,AT3G14440,AT3G48520,AT1G20510,AT1G12610,AT1G63030,AT4G01950,AT5G51990,AT2G33380,AT3G45650,AT3G45660,AT2G25160,ATCG00890,AT1G47510,AT1G73805,AT4G34410,AT1G64160	9.93844e-05	0.00252017	0.0163772
GO:0016702	oxidoreductase activity, acting on single donors with incorporation of molecular oxygen, incorporation of two atoms of oxygen	MF	4	30	215	26322	AT3G14440,AT3G45140,AT1G72520,AT1G17420	0.000100412	0.00252017	0.133333
GO:0032559	adenyl ribonucleotide binding	MF	39	2555	215	26322	AT3G01840,AT2G33580,AT3G25250,AT5G45820,AT1G76040,AT5G63770,AT5G65690,AT1G01560,AT4G36950,AT3G28600,AT1G14250,AT1G70130,AT1G56510,AT2G24130,AT4G21940,AT1G73080,AT1G61610,AT1G67000,AT3G25510,AT3G13100,AT3G22910,AT4G24150,AT5G19360,AT3G13090,AT1G27770,AT1G20510,AT5G40000,AT2G39800,AT3G08720,AT1G17750,AT3G17690,AT4G14368,AT5G58120,AT5G38350,AT1G63860,AT5G41740,AT5G38344,AT5G41550,AT5G41750	9.762e-05	0.00252017	0.0152642
GO:0030554	adenyl nucleotide binding	MF	39	2561	215	26322	AT3G01840,AT2G33580,AT3G25250,AT5G45820,AT1G76040,AT5G63770,AT5G65690,AT1G01560,AT4G36950,AT3G28600,AT1G14250,AT1G70130,AT1G56510,AT2G24130,AT4G21940,AT1G73080,AT1G61610,AT1G67000,AT3G25510,AT3G13100,AT3G22910,AT4G24150,AT5G19360,AT3G13090,AT1G27770,AT1G20510,AT5G40000,AT2G39800,AT3G08720,AT1G17750,AT3G17690,AT4G14368,AT5G58120,AT5G38350,AT1G63860,AT5G41740,AT5G38344,AT5G41550,AT5G41750	0.000102595	0.00253344	0.0152284
GO:0033993	response to lipid	BP	19	881	215	26322	AT5G45820,AT1G01560,AT1G47510,AT5G52050,AT2G17840,AT1G56600,AT3G06490,AT5G64750,AT1G09950,AT2G33380,AT1G69260,AT5G51990,AT4G21940,AT2G40330,AT5G19360,AT4G17615,AT2G46400,AT4G36830,AT5G13200	0.00012203	0.00296551	0.0215664
GO:0009966	regulation of signal transduction	BP	11	347	215	26322	AT5G64750,AT1G09950,AT4G34410,AT2G46400,AT5G45110,AT2G34600,AT1G17380,AT1G30135,AT3G53600,AT1G19180,AT5G13220	0.000143608	0.00343536	0.0317003
GO:0010200	response to chitin	BP	7	139	215	26322	AT2G33580,AT2G34600,AT4G34410,AT2G46400,AT3G53600,AT3G46080,AT2G44840	0.000150892	0.00355409	0.0503597
GO:0010646	regulation of cell communication	BP	11	356	215	26322	AT5G64750,AT1G09950,AT4G34410,AT2G46400,AT5G45110,AT2G34600,AT1G17380,AT1G30135,AT3G53600,AT1G19180,AT5G13220	0.000179326	0.00393205	0.0308989
GO:0023051	regulation of signaling	BP	11	355	215	26322	AT5G64750,AT1G09950,AT4G34410,AT2G46400,AT5G45110,AT2G34600,AT1G17380,AT1G30135,AT3G53600,AT1G19180,AT5G13220	0.000175018	0.00393205	0.0309859
GO:0065007	biological regulation	BP	83	7166	215	26322	AT5G13080,AT1G28480,AT1G01560,AT2G17660,AT4G14368,AT5G58120,AT5G45820,AT5G63770,AT1G57850,AT1G56510,AT1G63860,AT5G41740,AT5G38344,AT3G25510,AT2G32140,AT5G41550,AT5G41750,AT1G69260,AT4G34390,AT3G43890,AT1G76040,AT4G21940,AT5G19360,AT3G08720,AT1G70130,AT2G22760,AT2G20880,AT1G68880,AT5G64810,AT5G51990,AT5G43650,AT1G33760,AT5G01380,AT4G34410,AT1G12610,AT2G46400,AT3G53600,AT1G74930,AT1G63030,AT3G46080…	0.000177874	0.00393205	0.0115825
GO:0036094	small molecule binding	MF	47	3397	215	26322	AT3G01840,AT2G33580,AT3G17690,AT3G25250,AT5G45820,AT1G76040,AT5G63770,AT1G01560,AT4G36950,AT3G28600,AT1G14250,AT1G70130,AT1G56510,AT2G24130,AT4G21940,AT1G73080,AT1G61610,AT1G67000,AT3G13100,AT3G22910,AT5G19360,AT3G13090,AT1G27770,AT1G20510,AT5G40000,AT2G39800,AT3G08720,AT1G17750,AT4G34390,AT2G03240,AT1G26730,AT5G65690,AT3G25510,AT4G24150,AT2G40330,AT4G23590,AT3G08860,AT4G14368,AT5G58120,AT5G38350…	0.00017978	0.00393205	0.0138357
GO:0043168	anion binding	MF	47	3394	215	26322	AT2G03240,AT1G26730,AT3G01840,AT2G33580,AT3G25250,AT5G45820,AT1G76040,AT5G63770,AT5G65690,AT1G01560,AT4G36950,AT3G28600,AT1G14250,AT1G70130,AT1G56510,AT2G24130,AT4G21940,AT1G73080,AT1G61610,AT1G67000,AT3G25510,AT3G13100,AT3G22910,AT4G24150,AT5G19360,AT3G13090,AT1G27770,AT1G20510,AT5G40000,AT2G39800,AT3G08720,AT1G17750,AT4G34390,AT2G40330,AT4G23590,AT3G08860,AT3G17690,AT4G14368,AT5G58120,AT5G38350…	0.000176091	0.00393205	0.013848
GO:0033554	cellular response to stress	BP	24	1330	215	26322	AT5G47910,AT5G50260,AT1G73805,AT2G03240,AT2G02990,AT1G26730,AT4G36950,AT3G53600,AT5G13080,AT4G30280,AT5G58120,AT5G45630,AT3G25250,AT2G46400,AT5G66985,AT5G42380,AT4G01360,AT3G46080,AT5G62520,AT3G08720,AT1G78070,AT4G10250,AT2G20880,AT1G09950	0.000240102	0.00517741	0.0180451
GO:0009873	ethylene-activated signaling pathway	BP	8	202	215	26322	AT2G20880,AT1G33760,AT4G34410,AT1G74930,AT5G64750,AT1G19210,AT5G21960,AT2G44840	0.000268435	0.00570798	0.039604
GO:0042910	xenobiotic transmembrane transporter activity	MF	5	73	215	26322	AT3G13100,AT3G13090,AT1G66760,AT5G52050,AT1G61890	0.000332016	0.00696325	0.0684932
GO:0016701	oxidoreductase activity, acting on single donors with incorporation of molecular oxygen	MF	4	41	215	26322	AT3G14440,AT3G45140,AT1G72520,AT1G17420	0.000345883	0.00715603	0.097561
GO:0005509	calcium ion binding	MF	9	267	215	26322	AT4G05020,AT1G76040,AT3G01830,AT4G21940,AT5G42380,AT5G19360,AT5G47910,AT2G33380,AT4G17615	0.0003698	0.00754886	0.0337079
GO:0032555	purine ribonucleotide binding	MF	40	2830	215	26322	AT3G01840,AT2G33580,AT3G25250,AT5G45820,AT1G76040,AT5G63770,AT5G65690,AT1G01560,AT4G36950,AT3G28600,AT1G14250,AT1G70130,AT1G56510,AT2G24130,AT4G21940,AT1G73080,AT1G61610,AT1G67000,AT3G25510,AT3G13100,AT3G22910,AT4G24150,AT5G19360,AT3G13090,AT1G27770,AT1G20510,AT5G40000,AT2G39800,AT3G08720,AT1G17750,AT4G34390,AT3G17690,AT4G14368,AT5G58120,AT5G38350,AT1G63860,AT5G41740,AT5G38344,AT5G41550,AT5G41750	0.000392915	0.00791518	0.0141343
GO:0009617	response to bacterium	BP	13	526	215	26322	AT5G45110,AT5G64810,AT1G70130,AT2G46400,AT1G19180,AT1G73805,AT1G17750,AT4G34390,AT1G32960,AT1G51090,AT3G45140,AT1G72520,AT1G20510	0.00041796	0.0082038	0.0247148
GO:0017076	purine nucleotide binding	MF	40	2837	215	26322	AT3G01840,AT2G33580,AT3G25250,AT5G45820,AT1G76040,AT5G63770,AT5G65690,AT1G01560,AT4G36950,AT3G28600,AT1G14250,AT1G70130,AT1G56510,AT2G24130,AT4G21940,AT1G73080,AT1G61610,AT1G67000,AT3G25510,AT3G13100,AT3G22910,AT4G24150,AT5G19360,AT3G13090,AT1G27770,AT1G20510,AT5G40000,AT2G39800,AT3G08720,AT1G17750,AT4G34390,AT3G17690,AT4G14368,AT5G58120,AT5G38350,AT1G63860,AT5G41740,AT5G38344,AT5G41550,AT5G41750	0.00041298	0.0082038	0.0140994
GO:0032553	ribonucleotide binding	MF	40	2859	215	26322	AT3G01840,AT2G33580,AT3G25250,AT5G45820,AT1G76040,AT5G63770,AT5G65690,AT1G01560,AT4G36950,AT3G28600,AT1G14250,AT1G70130,AT1G56510,AT2G24130,AT4G21940,AT1G73080,AT1G61610,AT1G67000,AT3G25510,AT3G13100,AT3G22910,AT4G24150,AT5G19360,AT3G13090,AT1G27770,AT1G20510,AT5G40000,AT2G39800,AT3G08720,AT1G17750,AT4G34390,AT3G17690,AT4G14368,AT5G58120,AT5G38350,AT1G63860,AT5G41740,AT5G38344,AT5G41550,AT5G41750	0.000482158	0.0093441	0.0139909
GO:0071369	cellular response to ethylene stimulus	BP	8	222	215	26322	AT2G20880,AT1G33760,AT4G34410,AT1G74930,AT5G64750,AT1G19210,AT5G21960,AT2G44840	0.000503831	0.00964207	0.036036
GO:0005516	calmodulin binding	MF	8	224	215	26322	AT3G17690,AT1G76040,AT4G21940,AT1G61610,AT3G22910,AT5G19360,AT1G27770,AT1G73805	0.000534489	0.0100798	0.0357143
GO:0015333	peptide:proton symporter activity	MF	4	46	215	26322	AT1G59740,AT5G11570,AT3G45650,AT3G45660	0.000539871	0.0100798	0.0869565
GO:0043436	oxoacid metabolic process	BP	23	1328	215	26322	AT4G23590,AT4G31730,AT1G15040,AT2G39800,AT4G36830,AT3G45140,AT1G72520,AT1G65890,AT1G17420,AT1G02400,AT4G19230,AT3G14440,AT3G48520,AT1G20510,AT1G12610,AT1G63030,AT5G51990,AT2G33380,AT3G45650,AT3G45660,AT2G25160,AT1G73805,AT4G34410	0.000574596	0.0105989	0.0173193
GO:0006082	organic acid metabolic process	BP	23	1337	215	26322	AT4G23590,AT4G31730,AT1G15040,AT2G39800,AT4G36830,AT3G45140,AT1G72520,AT1G65890,AT1G17420,AT1G02400,AT4G19230,AT3G14440,AT3G48520,AT1G20510,AT1G12610,AT1G63030,AT5G51990,AT2G33380,AT3G45650,AT3G45660,AT2G25160,AT1G73805,AT4G34410	0.000629993	0.0114576	0.0172027
GO:0010035	response to inorganic substance	BP	19	1007	215	26322	AT2G33380,AT4G02280,AT3G14440,AT1G12610,AT3G53600,AT2G17840,AT1G56600,AT2G39800,AT4G17615,AT5G42380,AT3G17800,AT1G72520,AT5G59720,AT4G10250,AT5G24770,AT2G47780,AT2G20880,AT2G46400,AT5G52050	0.000642365	0.0114576	0.0188679
GO:0097367	carbohydrate derivative binding	MF	40	2901	215	26322	AT3G01840,AT2G33580,AT3G25250,AT5G45820,AT1G76040,AT5G63770,AT5G65690,AT1G01560,AT4G36950,AT3G28600,AT1G14250,AT1G70130,AT1G56510,AT2G24130,AT4G21940,AT1G73080,AT1G61610,AT1G67000,AT3G25510,AT3G13100,AT3G22910,AT4G24150,AT5G19360,AT3G13090,AT1G27770,AT1G20510,AT5G40000,AT2G39800,AT3G08720,AT1G17750,AT4G34390,AT3G17690,AT4G14368,AT5G58120,AT5G38350,AT1G63860,AT5G41740,AT5G38344,AT5G41550,AT5G41750	0.0006436	0.0114576	0.0137883
GO:0031347	regulation of defense response	BP	9	289	215	26322	AT2G17660,AT5G13220,AT1G73805,AT1G02660,AT1G51090,AT2G34600,AT1G17380,AT1G30135,AT1G19180	0.000653664	0.011503	0.0311419
GO:0009620	response to fungus	BP	14	626	215	26322	AT5G45110,AT5G50260,AT5G64810,AT4G19230,AT4G34410,AT1G51090,AT2G34930,AT5G64750,AT5G47910,AT2G33380,AT1G56510,AT3G45140,AT3G06490,AT1G17420	0.000678369	0.0118021	0.0223642
GO:0008300	isoprenoid catabolic process	BP	3	24	215	26322	AT3G14440,AT1G02400,AT4G19230	0.000958254	0.016301	0.125
GO:0031408	oxylipin biosynthetic process	BP	3	24	215	26322	AT3G45140,AT1G72520,AT1G17420	0.000958254	0.016301	0.125
GO:0010565	regulation of cellular ketone metabolic process	BP	5	97	215	26322	AT4G31730,AT1G12610,AT1G63030,AT1G73805,AT4G34410	0.00121641	0.0204651	0.0515464
GO:0097159	organic cyclic compound binding	MF	83	7594	215	26322	AT3G01840,AT2G33580,AT3G17690,AT3G25250,AT5G45820,AT1G76040,AT5G63770,AT1G01560,AT4G36950,AT3G28600,AT1G14250,AT1G70130,AT1G56510,AT2G24130,AT4G21940,AT1G73080,AT1G61610,AT1G67000,AT3G13100,AT3G22910,AT5G19360,AT3G13090,AT1G27770,AT1G20510,AT5G40000,AT2G39800,AT3G08720,AT1G17750,AT4G34390,AT2G22760,AT2G20880,AT5G51990,AT5G43650,AT5G67420,AT5G13080,AT5G01380,AT4G34410,AT1G12610,AT2G46400,AT1G74930…	0.00126438	0.0210409	0.0109297
GO:0000160	phosphorelay signal transduction system	BP	8	259	215	26322	AT2G20880,AT1G33760,AT4G34410,AT1G74930,AT5G64750,AT1G19210,AT5G21960,AT2G44840	0.00136424	0.022444	0.030888
GO:0071215	cellular response to abscisic acid stimulus	BP	9	322	215	26322	AT5G51990,AT4G21940,AT2G40330,AT5G19360,AT5G64750,AT1G09950,AT1G69260,AT4G17615,AT4G36830	0.00139267	0.022444	0.0279503
GO:0097306	cellular response to alcohol	BP	9	322	215	26322	AT5G51990,AT4G21940,AT2G40330,AT5G19360,AT5G64750,AT1G09950,AT1G69260,AT4G17615,AT4G36830	0.00139267	0.022444	0.0279503
GO:0009723	response to ethylene	BP	9	323	215	26322	AT2G20880,AT1G33760,AT4G34410,AT1G74930,AT5G64750,AT1G19210,AT5G21960,AT2G44840,AT3G06490	0.00142266	0.0226885	0.0278638
GO:0043167	ion binding	MF	73	6529	215	26322	AT2G03240,AT1G26730,AT4G05020,AT1G76040,AT3G01830,AT4G21940,AT5G42380,AT5G19360,AT5G47910,AT2G33380,AT4G17615,AT5G05340,AT4G14368,AT1G11190,AT3G48520,AT5G63770,AT2G28210,AT4G19230,AT2G27690,AT3G14440,AT3G53600,AT3G45140,AT2G25160,AT4G21840,AT1G51090,AT3G46080,AT3G22910,AT1G56600,AT1G02400,AT5G64110,AT1G27770,AT1G72520,AT5G52400,AT2G32930,AT1G17420,AT4G34390,AT3G01840,AT2G33580,AT3G25250,AT5G45820…	0.00159037	0.0251016	0.0111809
GO:1901363	heterocyclic compound binding	MF	82	7569	215	26322	AT3G01840,AT2G33580,AT3G17690,AT3G25250,AT5G45820,AT1G76040,AT5G63770,AT1G01560,AT4G36950,AT3G28600,AT1G14250,AT1G70130,AT1G56510,AT2G24130,AT4G21940,AT1G73080,AT1G61610,AT1G67000,AT3G13100,AT3G22910,AT5G19360,AT3G13090,AT1G27770,AT1G20510,AT5G40000,AT2G39800,AT3G08720,AT1G17750,AT4G34390,AT2G22760,AT2G20880,AT5G51990,AT5G43650,AT5G67420,AT5G13080,AT5G01380,AT4G34410,AT1G12610,AT2G46400,AT1G74930…	0.00181953	0.0284255	0.0108337
GO:0000166	nucleotide binding	MF	41	3174	215	26322	AT3G01840,AT2G33580,AT3G25250,AT5G45820,AT1G76040,AT5G63770,AT5G65690,AT1G01560,AT4G36950,AT3G28600,AT1G14250,AT1G70130,AT1G56510,AT2G24130,AT4G21940,AT1G73080,AT1G61610,AT1G67000,AT3G25510,AT3G13100,AT3G22910,AT4G24150,AT5G19360,AT3G13090,AT1G27770,AT1G20510,AT5G40000,AT2G39800,AT3G08720,AT1G17750,AT4G34390,AT3G17690,AT4G14368,AT5G58120,AT5G38350,AT1G63860,AT5G41740,AT5G38344,AT5G41550,AT5G41750…	0.00192988	0.0295465	0.0129175
GO:1901265	nucleoside phosphate binding	MF	41	3174	215	26322	AT3G01840,AT2G33580,AT3G17690,AT3G25250,AT5G45820,AT1G76040,AT5G63770,AT1G01560,AT4G36950,AT3G28600,AT1G14250,AT1G70130,AT1G56510,AT2G24130,AT4G21940,AT1G73080,AT1G61610,AT1G67000,AT3G13100,AT3G22910,AT5G19360,AT3G13090,AT1G27770,AT1G20510,AT5G40000,AT2G39800,AT3G08720,AT1G17750,AT4G34390,AT5G65690,AT3G25510,AT4G24150,AT4G14368,AT5G58120,AT5G38350,AT1G63860,AT5G41740,AT5G38344,AT5G41550,AT5G41750…	0.00192988	0.0295465	0.0129175
GO:1904680	peptide transmembrane transporter activity	MF	5	109	215	26322	AT1G59740,AT5G11570,AT3G45650,AT3G45660,AT1G09930	0.00203821	0.0308961	0.0458716
GO:0003700	DNA-binding transcription factor activity	MF	25	1651	215	26322	AT2G22760,AT2G20880,AT1G68880,AT5G64810,AT5G51990,AT5G43650,AT1G33760,AT5G13080,AT5G01380,AT4G34410,AT1G12610,AT2G46400,AT3G53600,AT1G74930,AT1G63030,AT3G46080,AT2G18550,AT3G06490,AT5G64750,AT1G73830,AT1G19210,AT3G03660,AT1G73805,AT5G21960,AT2G44840	0.00218646	0.0328184	0.0151423
GO:0009268	response to pH	BP	2	9	215	26322	AT3G45650,AT1G19180	0.00230208	0.0342182	0.222222
GO:0008144	drug binding	MF	35	2611	215	26322	AT2G03240,AT1G26730,AT3G01840,AT2G33580,AT3G25250,AT5G45820,AT1G76040,AT5G63770,AT5G65690,AT1G01560,AT4G36950,AT3G28600,AT1G14250,AT1G70130,AT1G56510,AT2G24130,AT4G21940,AT1G73080,AT1G61610,AT1G67000,AT3G25510,AT3G13100,AT3G22910,AT4G24150,AT5G19360,AT3G13090,AT1G27770,AT1G20510,AT5G40000,AT2G39800,AT3G08720,AT1G17750,AT4G23590,AT3G08860,AT5G45110	0.00235753	0.0347055	0.0134048
GO:0010193	response to ozone	BP	3	33	215	26322	AT5G42380,AT3G17800,AT1G72520	0.0024473	0.0356839	0.0909091
GO:0048653	anther development	BP	4	71	215	26322	AT1G72520,AT1G17420,AT5G50260,AT3G48520	0.00274279	0.0396151	0.056338
GO:0009738	abscisic acid-activated signaling pathway	BP	8	292	215	26322	AT5G64750,AT1G09950,AT5G51990,AT4G21940,AT2G40330,AT5G19360,AT1G69260,AT4G17615	0.0028728	0.0407245	0.0273973
GO:0010371	regulation of gibberellin biosynthetic process	BP	2	10	215	26322	AT1G12610,AT1G63030	0.00286214	0.0407245	0.2
GO:0009686	gibberellin biosynthetic process	BP	3	35	215	26322	AT1G12610,AT1G63030,AT1G02400	0.00290082	0.0407445	0.0857143
GO:0006629	lipid metabolic process	BP	19	1152	215	26322	AT4G36830,AT3G45140,AT1G72520,AT1G65890,AT1G17420,AT3G54020,AT4G01950,AT1G02400,AT4G19230,AT3G14440,AT1G12610,AT1G63030,AT1G02660,AT1G54020,AT4G30140,AT2G33380,AT1G47510,AT4G36950,AT3G20520	0.00299163	0.0416381	0.0164931
GO:0009685	gibberellin metabolic process	BP	3	36	215	26322	AT1G02400,AT1G12610,AT1G63030	0.00314565	0.0433872	0.0833333
GO:0019752	carboxylic acid metabolic process	BP	19	1161	215	26322	AT4G23590,AT4G31730,AT1G15040,AT2G39800,AT4G36830,AT3G45140,AT1G72520,AT1G65890,AT1G17420,AT1G02400,AT4G19230,AT3G14440,AT3G48520,AT1G20510,AT1G12610,AT1G63030,AT2G33380,AT1G73805,AT4G34410	0.00325562	0.0445032	0.0163652
GO:0042887	amide transmembrane transporter activity	MF	5	122	215	26322	AT1G59740,AT5G11570,AT3G45650,AT3G45660,AT1G09930	0.00332151	0.045002	0.0409836
GO:0080086	stamen filament development	BP	2	11	215	26322	AT1G72520,AT1G17420	0.0034794	0.0467277	0.181818
GO:0016102	diterpenoid biosynthetic process	BP	3	38	215	26322	AT1G02400,AT1G12610,AT1G63030	0.00367242	0.0488912	0.0789474
